# Supplementary figures and images for: Spontaneous ligand loss by soft landed [Ni(bpy) 3 ] 2+ ions on perfluorinated self-assembled monolayer surfaces
Source: Royal Society of Chemistry journal article supplement (doi:10.1039/d4sc02527j), 2024-01-01

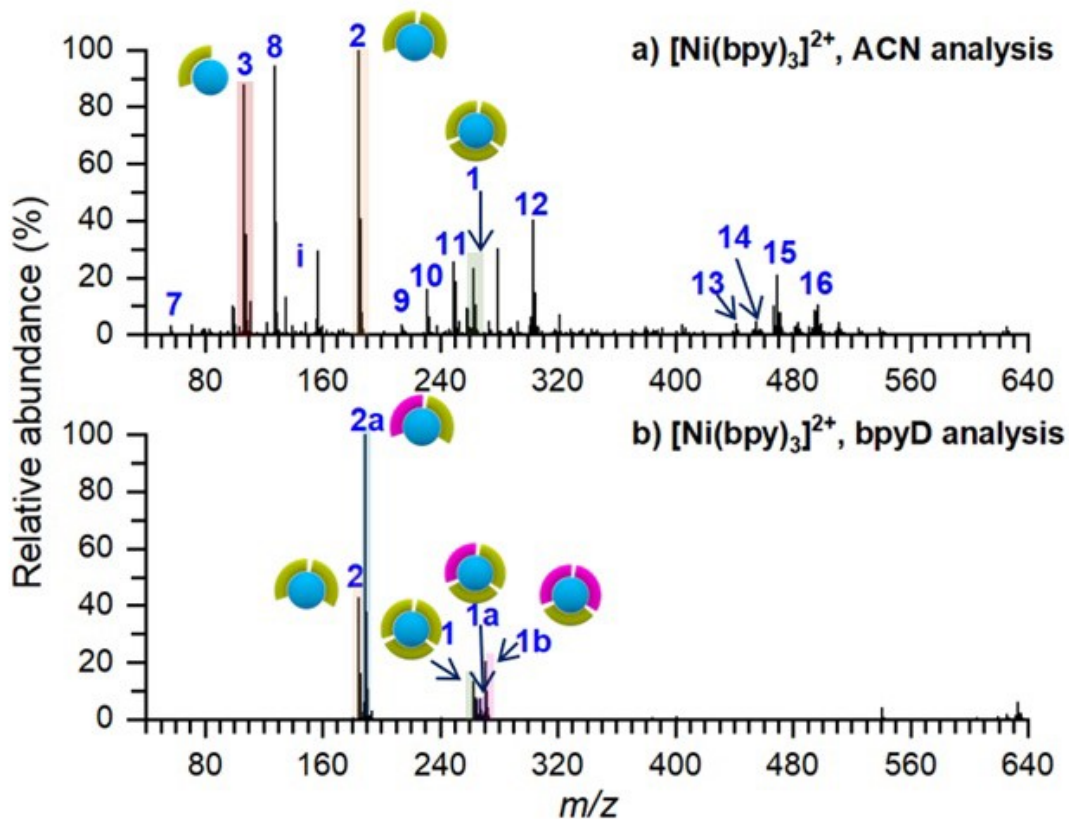

Supplement: d4sc02527j2.pdf [file d4sc02527j2.pdf]

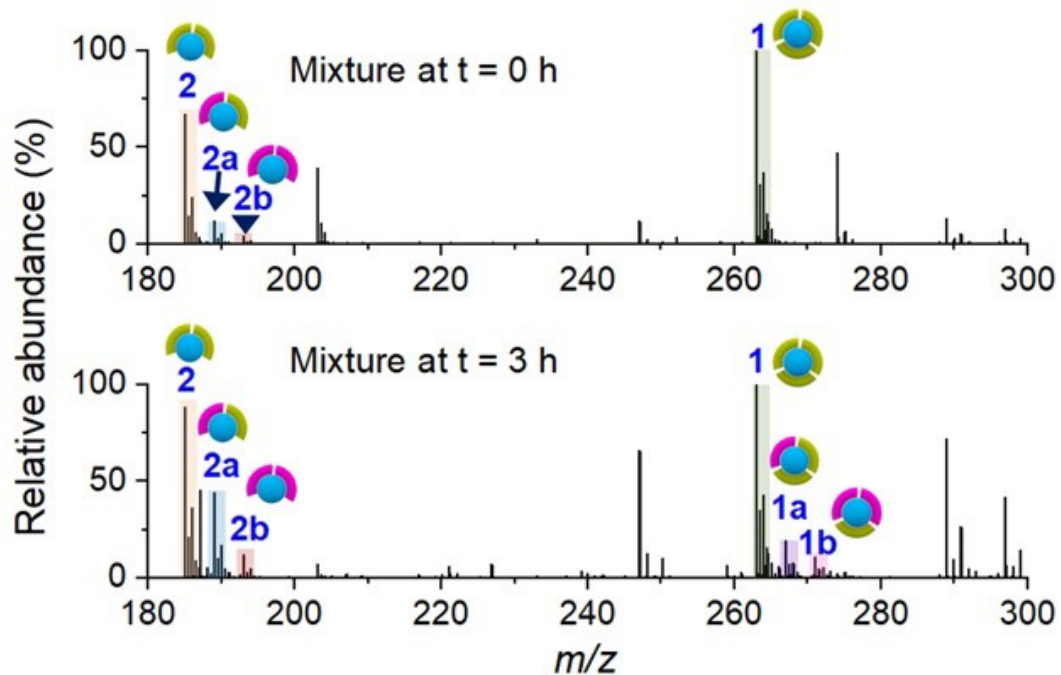

Supplement: d4sc02527j3.pdf [file d4sc02527j3.pdf]

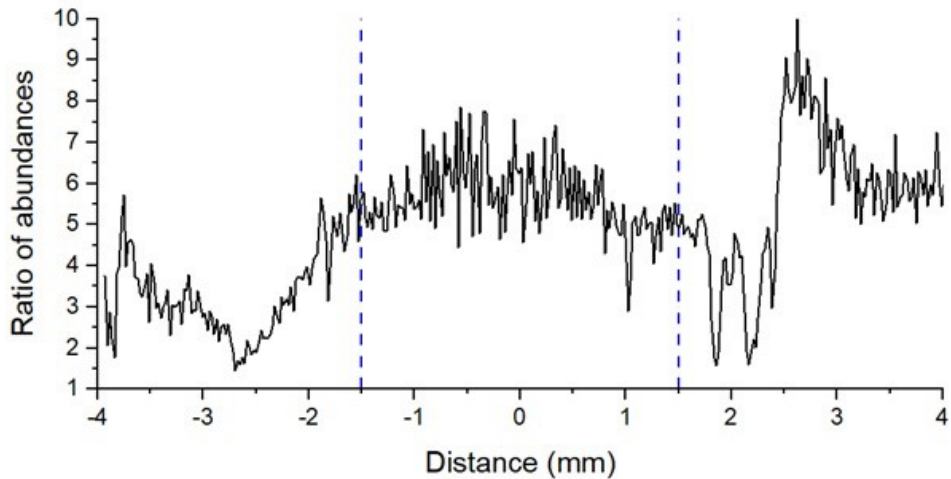

Supplement: d4sc02527j4.pdf [file d4sc02527j4.pdf]

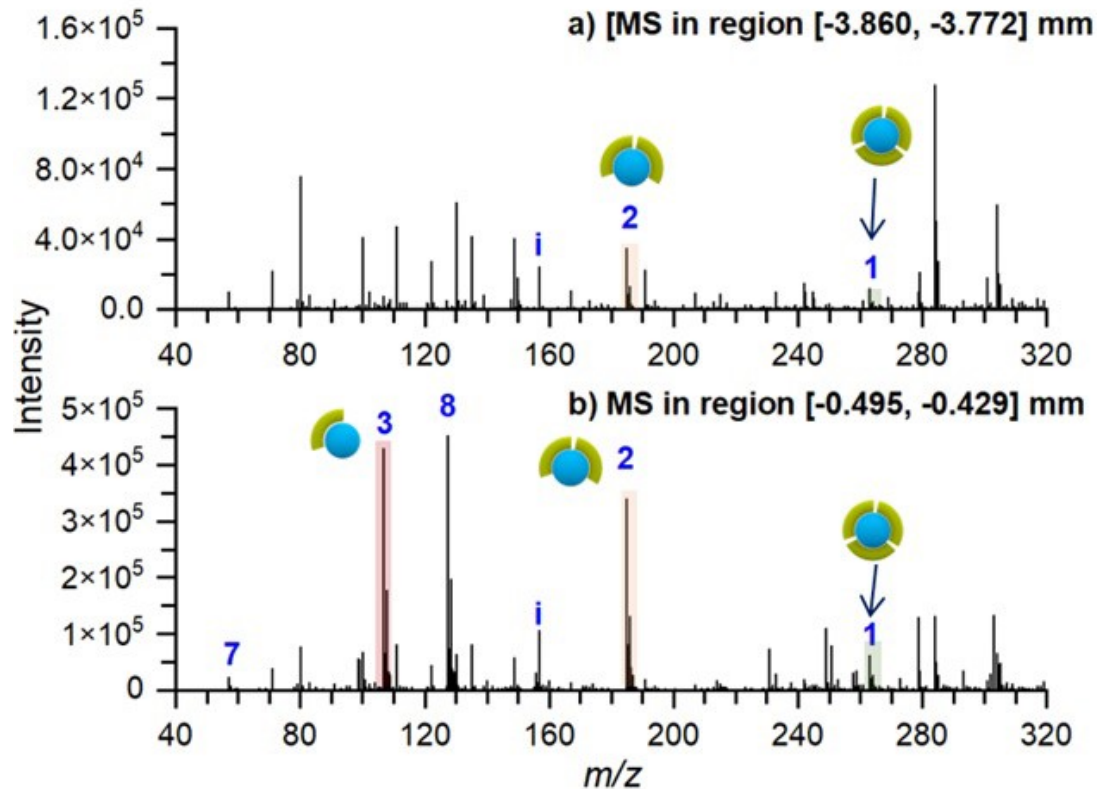

Supplement: d4sc02527j5.pdf [file d4sc02527j5.pdf]

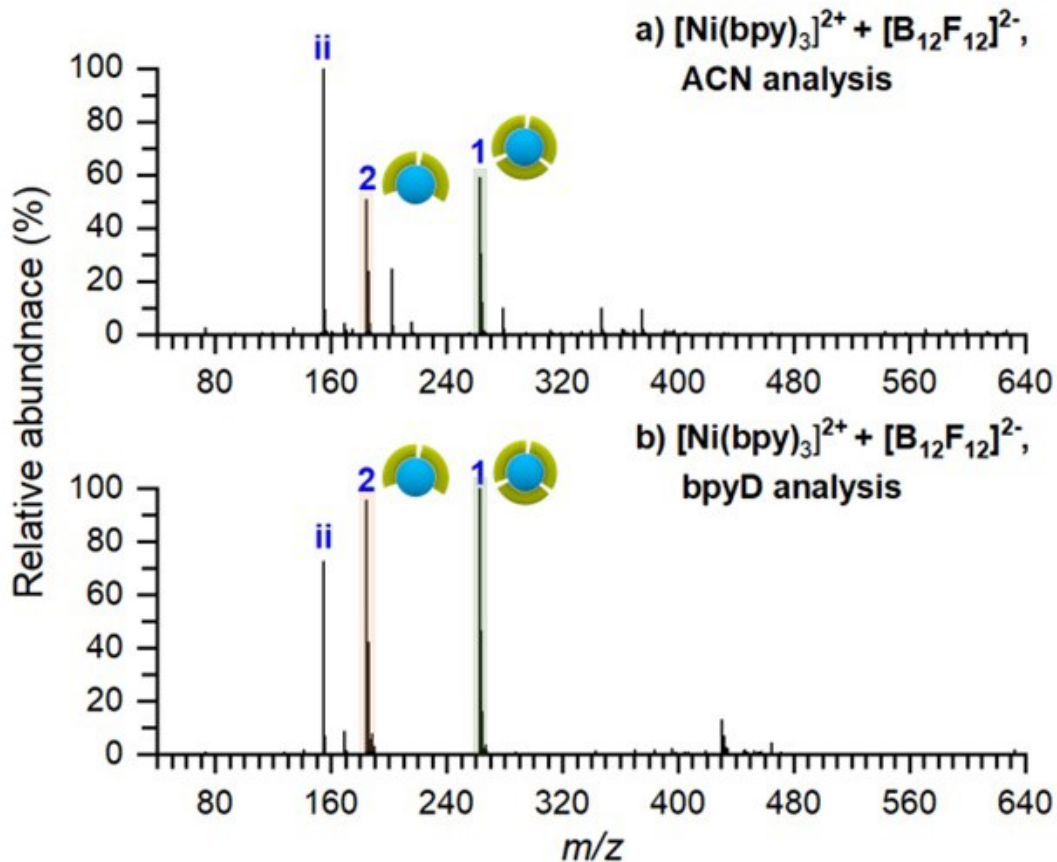

Supplement: d4sc02527j6.pdf [file d4sc02527j6.pdf]

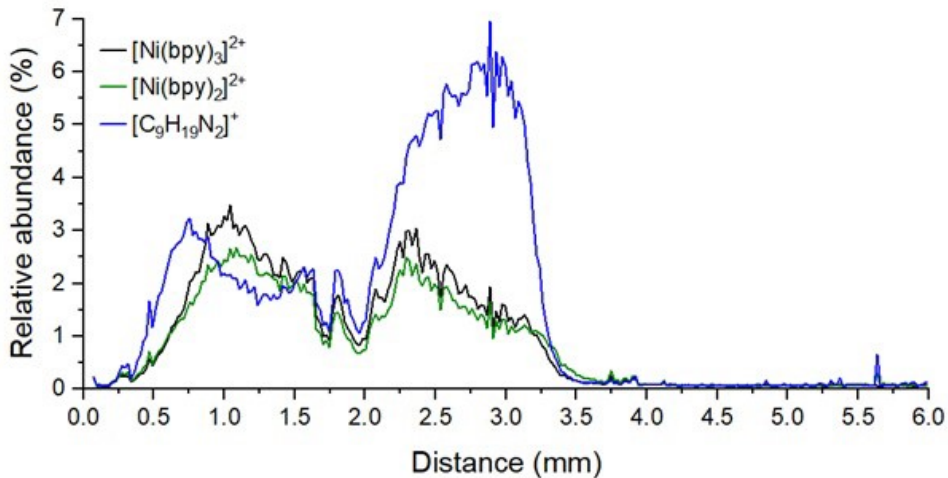

Supplement: d4sc02527j7.pdf [file d4sc02527j7.pdf]

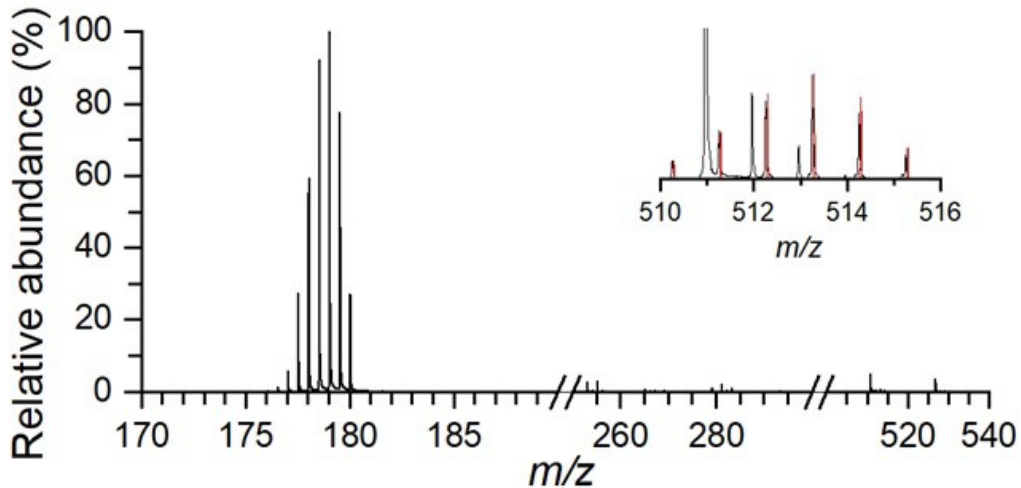

Supplement: d4sc02527j8.pdf [file d4sc02527j8.pdf]

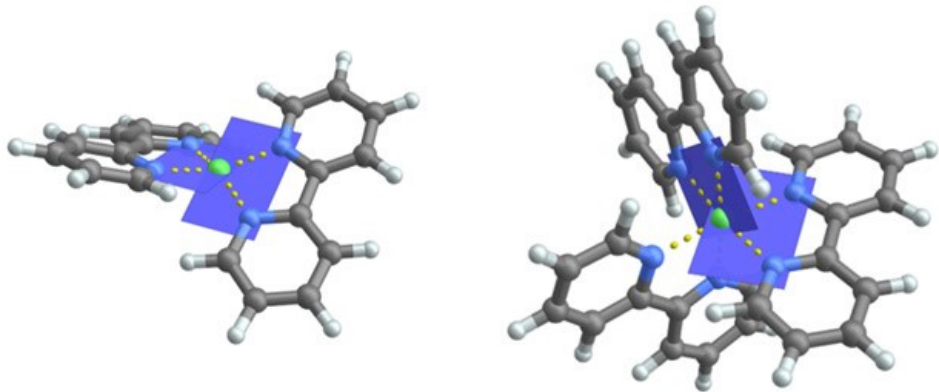

Supplement: d4sc02527j9.pdf [file d4sc02527j9.pdf]
